# Supplementary material
Source: Springer Nature journal article supplement (https://www.springermedizin.de/resource/supplementary/12913_2013_2630_MOESM2_ESM.pdf/9532220)

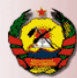

# RETROINFORMAÇÃO GORONGOSA 2010/2011

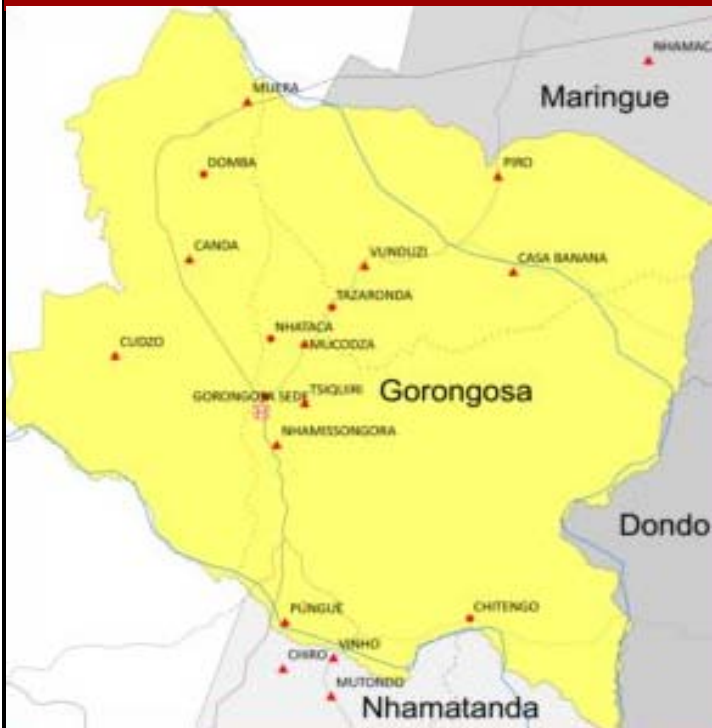

| POPULAÇÃO - 2011      |           | R-HUMANOS (DISTRITO)      |           |
|-----------------------|-----------|---------------------------|-----------|
| População - Dist      | 138542    | Médicos                   | 1         |
| Grávidas Previstas    | 6288      | Técnico Superiores        | 1         |
| Partos Previstos      | 6234      | Téc. Medicina Geral       | 9         |
| Crianças 0-11 meses   | 5031      | Tec. Medicina Preventiva  | 3         |
| <b>REDE SANITÁRIA</b> |           | Enfermeiras SMI - Médio   | 3         |
| <b>Tipo</b>           | <b>Nº</b> | Enfermagem - Médios       | 3         |
| Hospital Central      | 0         | Outros - Médios           | 5         |
| Hospital Rural        | 0         | Administrativos - Médios  | 0         |
| C.S. Urbano A         | 0         | Enfermeiras SMI - Básicas | 10        |
| C.S. Urbano B         | 0         | Enfermagem - Básicas      | 11        |
| C.S Urbano C          | 0         | Outros - Básicos          | 12        |
| C.S Rural I           | 1         | Administrativos - Básicos | 1         |
| C.S. Rural II         | 10        | Agentes de Serviço        | 33        |
| Posto de Saúde:       | 3         | Outros                    | 5         |
| <b>Total</b>          | <b>14</b> | <b>Total</b>              | <b>97</b> |

| RECURSOS MATERIAIS (DISTRITO)- DEZ/2011 |            |           |       |
|-----------------------------------------|------------|-----------|-------|
|                                         | Funcionais | Avariadas | Total |
| Viaturas                                | 3          | 1         | 4     |
| Motorizadas                             | 3          | 12        | 15    |
| Geleiras - PAV                          | 7          | 2         | 11    |

**1a CPN; PARTOS INST.; E P. FAMILIAR**

| UNIDADES SANITÁRIA     | 1a CPN      |             | P. INST     |             | P. FAM      |             |
|------------------------|-------------|-------------|-------------|-------------|-------------|-------------|
|                        | 2010        | 2011        | 2010        | 2011        | 2010        | 2011        |
| Canda                  | 1161        | 908         | 435         | 399         | 733         | 192         |
| Casa Banana            | 202         | 242         | 17          | 37          | 7           | 31          |
| Cudzo                  | 218         | 354         | 18          | 102         | 36          | 26          |
| Gorongosa              | 2961        | 2970        | 1889        | 1820        | 744         | 1293        |
| Mucodza                | 1046        | 976         | 401         | 334         | 237         | 175         |
| Muera                  | 5           | 133         | 1           | 8           | 4           | 65          |
| Nhamissongora          | 272         | 220         | 20          | 30          | 79          | 46          |
| Piro                   | 425         | 454         | 161         | 219         | 160         | 123         |
| Púngué                 | 651         | 545         | 213         | 225         | 64          | 68          |
| Tsiquir                | 381         | 325         | 99          | 31          | 120         | 91          |
| Vunduzi                | 650         | 521         | 240         | 236         | 100         | 65          |
| <b>Total Distrital</b> | <b>7972</b> | <b>7648</b> | <b>3494</b> | <b>3441</b> | <b>2284</b> | <b>2175</b> |

Planeamento Familiar :Novas utentes  
Vermelho: Redução de produtividade >10%

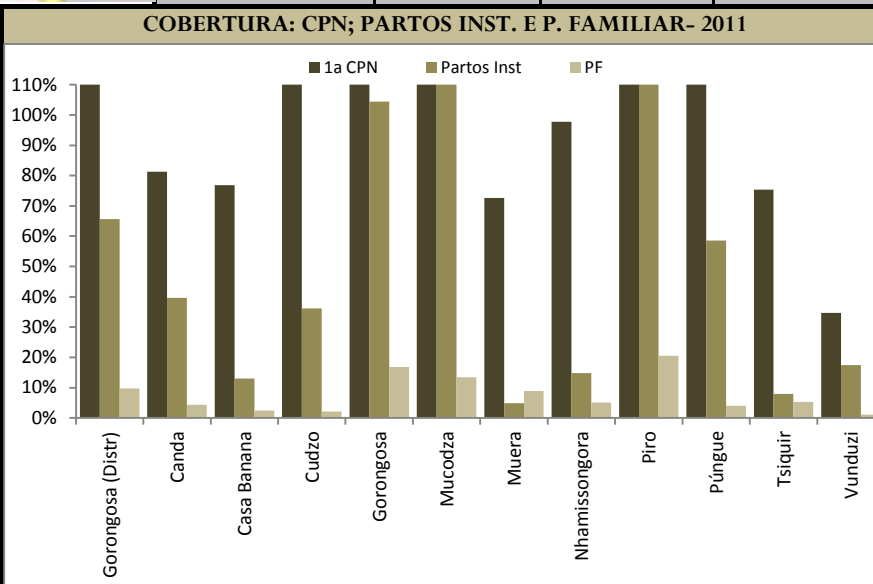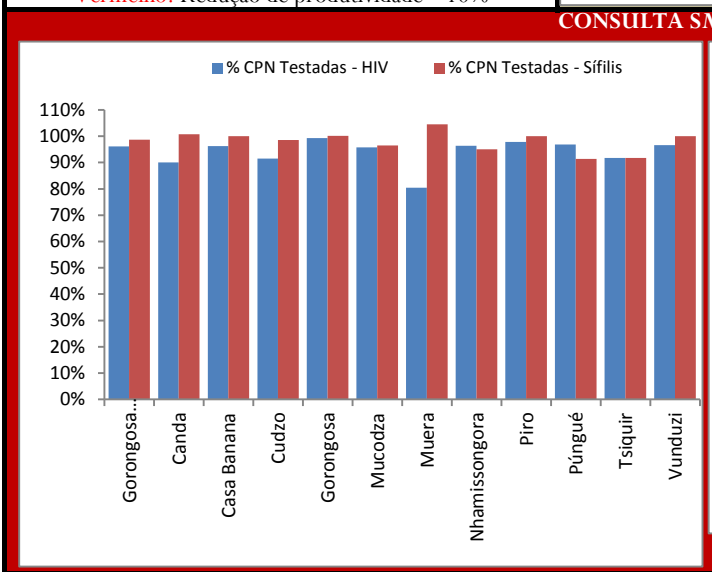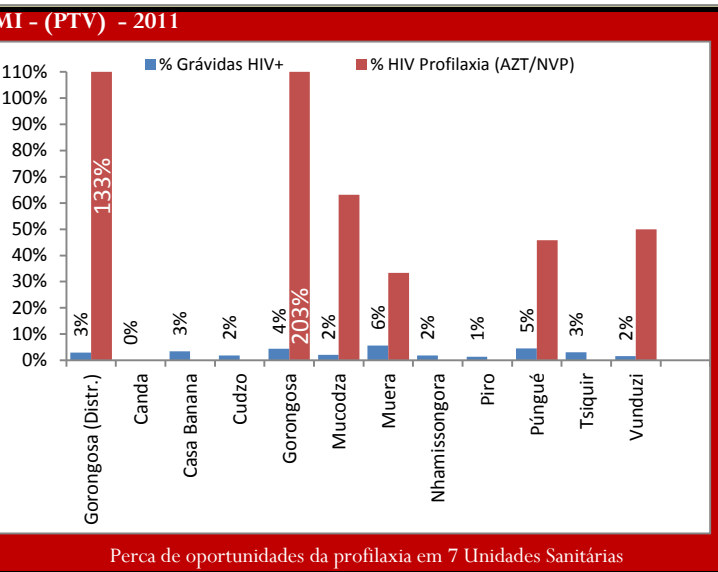

Perca de oportunidades da profilaxia em 7 Unidades Sanitárias

# RETRO - INFORMAÇÃO 2010/2011 - Gorongosa

## COBERTURA - PAV - 2011

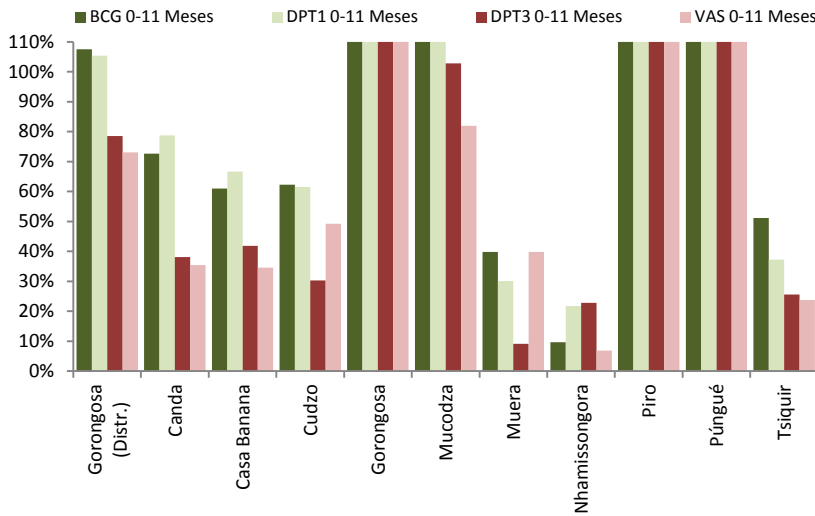

## NUTRIÇÃO (Distr.)

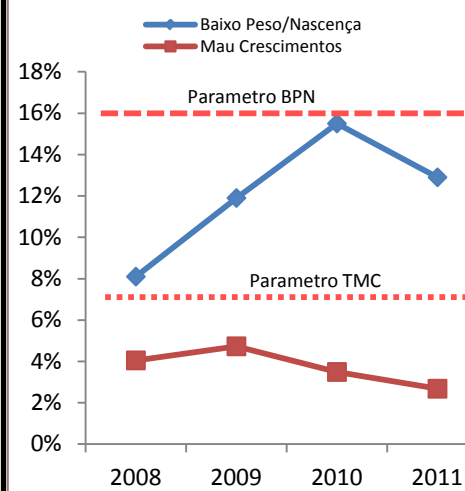

Todas US com cobertura abaixo de 100% menos o CS Gorongosa

Todos indicadores abaixo do limiar em quatro anos consecutivos

## CONSULTAS EXTERNAS REALIZADAS

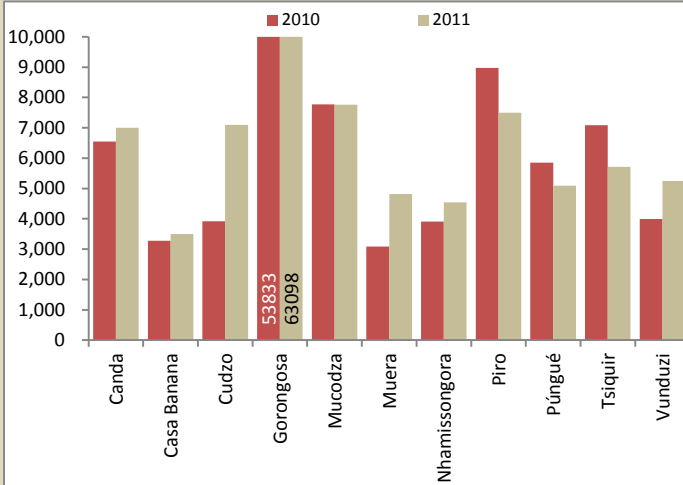

Aumento de consultas >10% nas seguintes US. Gorongosa Sede, Cudzo, Vunduzi, Muera e Nhamissongora

## CASOS DA DIARREIA NOTIFICADOS-BES

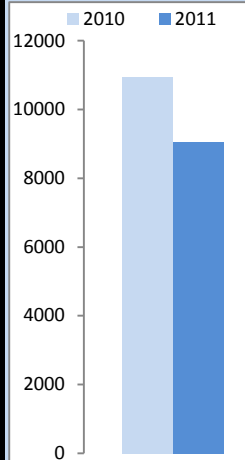

Redução da diarreia em 20%

## CASOS DE MALÁRIA CONFIRMADOS E NOTIFICADOS 2011-BES/LAB

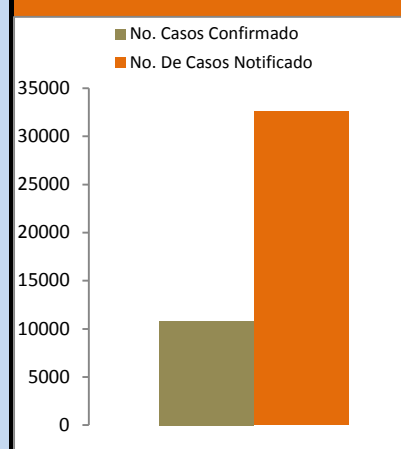

Diferença de 21740 entre casos notificados e confirmados

### Percentagem de Disponibilidade e Concordância Alta

| Indicadores                  | Gorongosa |       | Mucodza |       |
|------------------------------|-----------|-------|---------|-------|
|                              | 2009      | 2010  | 2009    | 2010  |
| <b>Partos Institucionais</b> |           |       |         |       |
| Disponibilidade              | 80.0%     | 75.0% | 98.3%   | 93.3% |
| Alta Concordância            | 90.9%     | 100%  | 97.2%   | 100%  |
| <b>Consultas Externas</b>    |           |       |         |       |
| Disponibilidade              | 73.3%     | 70.0% | 76.7%   | 90.0% |
| Alta Concordância            | 12.5%     | -     | 82.4%   | 97.1% |
| <b>1a Consulta Pré-Natal</b> |           |       |         |       |
| Disponibilidade              | 77.8%     | 87.5% | 95.8%   | 95.8% |
| Alta Concordância            | -         | 86.5% | 88.6%   | 82.2% |
| <b>3a Dose DPT HepB-HIB</b>  |           |       |         |       |
| Disponibilidade              | 72.2%     | 76.4% | 94.4%   | 95.8% |
| Alta Concordância            | -         | 74.1% | 72.7%   | 68.6% |

### Disponibilidade de Material Essencial

| NB:(n=3)         | Disponibilidade | Ruptura últimos 3 meses |
|------------------|-----------------|-------------------------|
| Cotrimoxazole    | 3 (100%)        | 0 (0.0%)                |
| Coartem Criança  | 2 (100%)        | 1 (50.0%)               |
| Coartem Adulto   | 3 (100%)        | 1 (33.3%)               |
| Sal Ferroso      | 3 (100%)        | 2 (66.7%)               |
| Plumpy Nut       | 3 (100%)        | 0 (0.0%)                |
| TARV (1a Linha)  | 2 (100%)        | 0 (0.0%)                |
| DPT              | 2 (66.7%)       | 1 (33.3%)               |
| Preservativos    | 2 (66.7%)       | 1 (33.3%)               |
| Luvas de Exame   | 3 (100%)        | 0 (0.0%)                |
| Geleiras         | 1 (50.0%)       | 1 (50.0%)               |
| Teste de Sífilis | 3 (100%)        | 0 (0.0%)                |
| TR Malária       | 3 (100%)        | 1 (33.3%)               |
| Determine        | 0 (0.0%)        | 3 (100%)                |

### TAXA DE DESPISTE E CURA

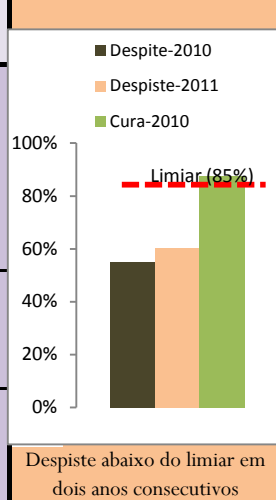

Despiste abaixo do limiar em dois anos consecutivos

Fonte: Módulo Básico; Programas, Estudos CIOB

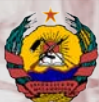

REPÚBLICA DE MOÇAMBIQUE  
GOVERNO DA PROVÍNCIA DE SOFALA  
DIREÇÃO PROVINCIAL DE SAÚDE

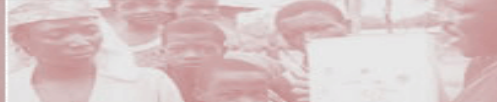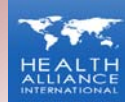

Supplement: MOESM2 [file 9532220]
